# Supplementary material for: Texture-Modified Diets, Nutritional Status and Mealtime Satisfaction: A Systematic Review
Source: MDPI journal article supplement (doi:10.3390/healthcare9060624), 2021-05-24
Supplement: s1 [file s1]

## Supplementary data S2

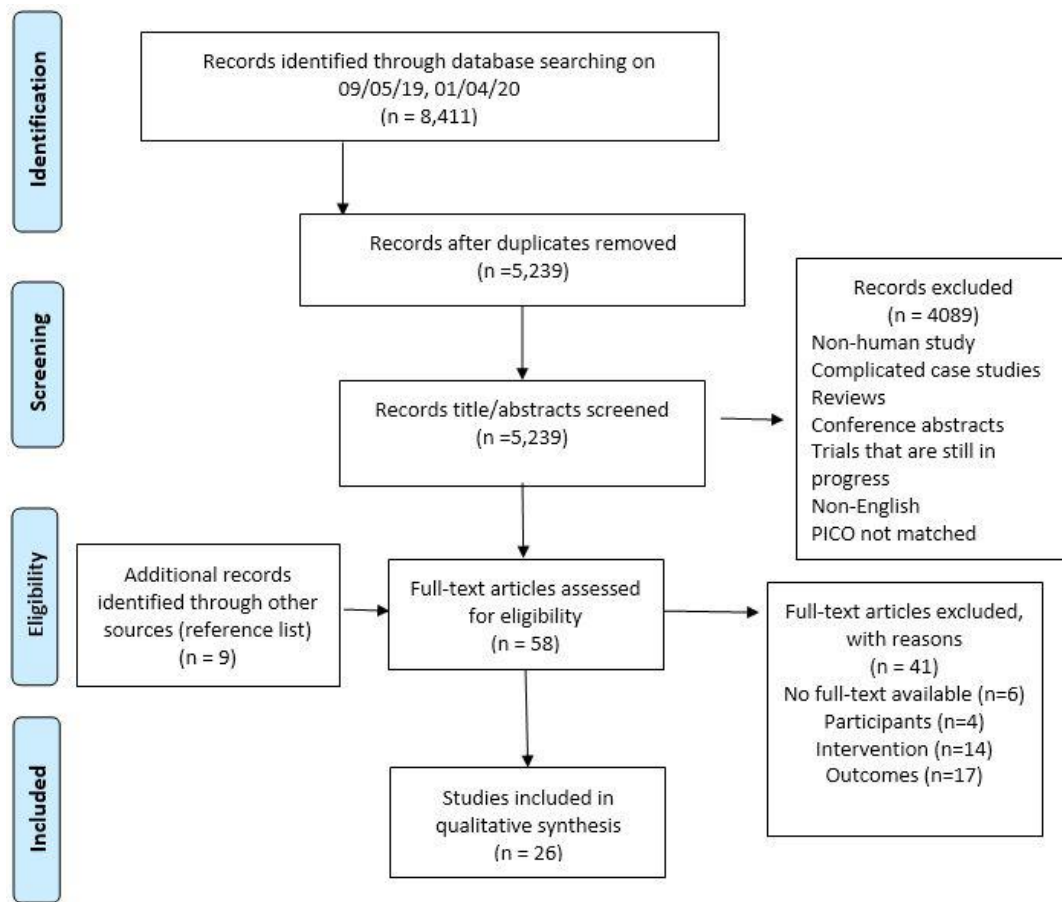

**Figure 1.** PRISMA flow chart diagram of study selection process.

Note. Lab studies without human participants (participants), studies without TMDs or TFs consumers (intervention) or study outcomes did not include nutrition measurement (outcomes) were excluded.
