# Supplementary material for: Texture-Modified Diets, Nutritional Status and Mealtime Satisfaction: A Systematic Review
Source: MDPI journal article supplement (doi:10.3390/healthcare9060624), 2021-05-24
Supplement: s1 [file s1]

## Supplementary data S1 Search strategy

### COCHARANE via Central

1. Food OR diet OR meal OR nutrition in Title Abstract Keyword
2. modifi\* OR modify\* OR TMD OR puree\* OR mince\* OR blend\* OR chop\* OR soft OR thicken\* OR liquid\* OR solid\* OR fluid\* in Title Abstract Keyword
3. adequa\* OR require\* OR supplement\* OR fortificat\* OR snack\* OR intake OR energy OR protein OR micronutri\* OR satisfact\* OR complian\* OR quality\* in Title Abstract Keyword
4. 1 and 2 and 3

### MEDLINE (Ovid)

1. (texture\* adj1 modif\* adj (food or foods or diet or diets or meal or meals)).ti,ab,kw.
2. ((puree or pureed or mince\* or blend\* or chop\* or soft or soften\* or thicken\* or liquid\* or liquef\*) adj1 (food or foods or diet or diets or meal or meals or fluid or fluids)).mp.
3. 1 or 2
4. limit 3 to "humans only (removes records about animals)"
5. limit 4 to ("young adult (19 to 24 years)" or "adult (19 to 44 years)" or "young adult and adult (19-24 and 19-44)" or "middle age (45 to 64 years)" or "middle aged (45 plus years)" or "all aged (65 and over)" or "aged (80 and over)")

### EMBASE (Ovid)

1. (texture\* adj1 modif\* adj (food or foods or diet or diets or meal or meals)).ti,ab,kw.
2. ((puree or pureed or mince\* or blend\* or chop\* or soft or soften\* or thicken\* or liquid\* or liquef\*) adj1 (food or foods or diet or diets or meal or meals or fluid or fluids)).mp.
3. 1 or 2
4. limit 3 to "humans only (removes records about animals)"
5. limit 4 to (adult <18 to 64 years> or aged <65+ years>)

### SCOUPUS

1. TITLE-ABS-KEY ((texture\* W/1 modif\* ) W/1 ( food\* or diet\* or meal\* ) )
2. TITLE-ABS-KEY ((puree\* or mince\* or blend\* or chop\* or soft or soften\* OR thicken\* or liquid\* or liquef\*) W/1 (food\* or diet\* or meal\* or fluid\*))
3. 1 and 2

### CINAL PLUS (EBSCOhost)

1. texture\* N1 modif\* N1 (food\* or diet\* or meal\*
2. ((puree\* or mince\* or blend\* or chop\* or soft or soften\* or thicken\* or liquid\* or liquef\*) N1 (food\* or diet\* or meal\* or fluid\* ))
3. 1 or 2

### Search Results:

**Search date:** 5<sup>th</sup> May 2019

CENTRAL - (Cochrane Central Register of Controlled Trials), 1450 results

MEDLINE (Ovid), 2313 results.

EMBASE (Ovid), 2887 results

SCOPUS, 51 results, 2 more result was found at 25<sup>th</sup> June 2019

CINAL Plus (EBSCOhost), 464 results

**Updated search date:** 1<sup>st</sup> April 2021

CENTRAL - (Cochrane Central Register of Controlled Trials), 88 results

MEDLINE (Ovid), 161 results.

EMBASE (Ovid), 913 results

SCOPUS, 14 results

CINAL Plus (EBSCOhost), 78 results
